# Supplementary material for: A Quantitative Assessment of Pre-Operative MRI Reports in Glioma Patients: Report Metrics and IDH Prediction Ability
Source: Front Oncol. 2021 Jan 29;10:600327. doi: 10.3389/fonc.2020.600327 (PMC7879978; doi:10.3389/fonc.2020.600327)
Supplement: Supplementary file 2 [file DataSheet_2.xlsx]

## Sheet: Findings
NLP ID	SEX	AGE	Scan Date	OS	Pathological diagnosis	IDH	MGMT	Grade	Tokens	Words	Sentences	Findings (Raw)
1	M	80.2082	2018-05-14	103	Glioblastoma	IDH-WT	unmeth	4	185	168	10	There is a 4.8 x 2.1 x 3 cm heterogeneously enhancing and likely partially necrotic intra-axial mass in the left temporo-occipital lobe situated in the periventricular white matter and extending along the atrium and occipital horn of the left lateral ventricle with thin subtle ependymal enhancement. There is associated mild slow diffusion likely secondary to hypercellularity, as well as a few foc…
2	M	52.7151	12/21/2017	387	Glioblastoma	IDH-WT	unmeth	4	111	96	7	There is 5.0 x 4.0 x 4.0 (AP, TR, CC) heterogenous avidly enhancing mass in left occipital lobe cuneus with extensive surrounding vasogenic edema extending into left occipital, left parietal and splenium of corpus callosum. There is heterogeneous restricted diffusion, with some blood products and prominent internal vascularity within this mass. There is mass effect on posterior aspect of left lat…
3	M	60.2274	2016-09-15	812	Glioblastoma	IDH-WT	meth	4	159	137	10	A 1.7 x 2.0 x 1.7 cm (AP by TV by CC) T1 hypointense, T2/FLAIR hyperintense parenchymal lesion is seen in the left cerebellar hemisphere/middle cerebellar peduncle. This lesion demonstrates peripheral enhancement without diffusion restriction or susceptibility artifact, and does not appear associated with the left cerebellopontine angle. A small amount of surrounding FLAIR hyperintense signal is …
4	F	49.1014	06/14/2017	569	Glioblastoma	IDH-WT	unmeth	4	169	149	11	There is a 2.1 x 2.6 x 2.7 cm (AP by TV by CC) well marginated heterogeneous lesion with peripheral diffusion restriction centered in the left parietal lobe (posterior to the post-central gyrus). Irregular nodular peripheral enhancement is more conspicuous anteriorly and inferiorly. Areas of T2 hyperintense signal may represent necrosis or cystic components. Foci of susceptibility artifact are no…
5	M	76.0027	06/01/2018	78	Glioblastoma	IDH-WT	unmeth	4	235	209	12	There is a 6.1 x 5.2 x 5.2 cm (AP X TRV X CC) heterogeneously enhancing mass centered in the right frontal lobe, with involvement of the genu and anterior body of the corpus callosum, and extends across the midline. It demonstrates central areas of nonenhancement which can represent necrosis. There are also internal foci of low signal on susceptibility weighted imaging, suggestive of hemorrhage. …
6	M	58.211	09/26/2014	#N/A	Glioblastoma	IDH-WT	NA	4	186	162	11	There is a mass centered in the right posteroinferior temporal lobe measuring approximately 3.2 x 2.4 x 3 cm (ap x trv x cc) demonstrating thick, irregular marginal enhancement and central nonenhancing T2 hyperintensity possibly as a result of necrosis. There is also mild marginal and central restricted diffusion suggesting increased cellularity. The mass demonstrates scattered areas of magnetic …
8	M	20.8027	11/18/2015	1013	Oliogoastrocytoma	IDH-MT	meth	2	122	105	10	A T2/FLAIR hyperintense lesion is seen in the periphery of the left superior temporal gyrus with associated gyral expansion measuring approximately 4.1 x 2.9 cm. There is no appreciable enhancement. Some restricted diffusion is seen within the periphery of the lesion, and there is mildly elevated relative cerebral blood volume. There is minimal associated mass effect. No additional lesions are id…
9	M	46.4027	05/22/2016	727	Glioblastoma	IDH-WT	unmeth	4	206	185	7	An intraparenchymal hemorrhages again seen centered within the superior right frontal lobe measuring 3.8 x 3.7 x 4 cm (AP x TR x CC). Postcontrast including subtracted images demonstrate a heterogeneously enhancing mass immediately anterior and superior to the hematoma which measures 3.3 x 3.3 x 3.1 cm (AP x TR x CC). The lesion demonstrates irregular, nodular/lobulated peripheral enhancement wit…
10	M	74.411	2016-04-21	154	Glioblastoma	IDH-WT	meth	4	133	120	7	There is a 4.4 x 3.3 x 3 cm irregularly enhancing mass in the left frontal lobe with extensive surrounding FLAIR signal abnormality which extends partly into the corpus callosum (series 4 image 49) and into the superior aspect of the insula. More subtle enhancement is seen posteriorly in the left inferior frontal gyrus / precentral region. There is mass effect on the left lateral ventricle with s…
11	M	69.6	2016-09-20	850	Glioblastoma	IDH-WT	meth	4	203	173	11	Significant patient motion degrades image quality on multiple pulse sequences. A T1 hypointense, T2/FLAIR hyperintense lesion centered in the left temporal lobe measures 5.0 x 3.5 x 3.7 cm (AP by TV by CC). This lesion appears intraparenchymal, partially restricts diffusion and demonstrates heterogeneous enhancement. Foci of susceptibility artifact within this lesion represent blood products. Fur…
12	F	74.8438	10/05/2017	431	Glioblastoma	IDH-WT	unmeth	4	119	107	9	Large right hemispheric mass with associated mass effect and marked surrounding vasogenic edema. There is approximately 1.2 cm of leftward midline shift and early subfalcine herniation. There is effacement of the suprasellar cistern and right cerebral peduncle with mild uncal herniation. Patchy foci of FLAIR hyperintensity in the left cerebellum without associated enhancement, nonspecific. Puncta…
13	F	58.5726	2016-03-03	70	Anaplastic astrocytoma	IDH-WT	meth	3	312	274	13	Evaluation of the study is mildly limited by patient motion artifact. There is a complex cystic (likely centrally necrotic) heterogeneously enhancing mass in the right frontoparietal lobe intimately abutting the atrium of the right lateral ventricle, measuring approximately 4.3 x 3.7 x 3.9 cm (ap x trv x cc). There is prominent magnetic susceptibility artifact in the inferior aspect of this mass,…
15	M	61.5671	09/10/2016	458	Glioblastoma	IDH-WT	meth	4	200	182	11	There is a 4.5 x 3 x 4.4 cm mass in the left inferior temporal lobe, with peripheral and heterogenous central enhancement, which appears to be intra-axial. There is a primarily linear focus of intrinsic T1 hyperintensity with associated blooming artifact in the posterior medial aspect of the lesion. The lesion shows areas of mild heterogeneous restricted diffusion, with more focal diffusion restr…
16	M	46.8767	2018-09-14	180	Glioblastoma	IDH-WT	unmeth	4	172	151	8	There is a large heterogeneously enhancing mixed solid and cystic/necrotic tumor centered in the splenium of the corpus callosum extending across midline, larger on the right side, and exerting mass effect on the occipital horn and atrium of the right lateral ventricle, with extension superiorly on the right in the region of the cingulate gyrus and periatrial/periventricular white matter. This ma…
17	M	63.1534	2017-04-12	300	Glioblastoma	IDH-WT	meth	4	149	126	10	There is a heterogenous enhancing mass in medial aspect of right temporal lobe measures 6.3 x 5.3 x 5.3 cm (AP, TR, CC) with extensive surrounding vasogenic edema and 11 mm leftward subfalcine herniation. Mass demonstrates multiple foci of restricted diffusion, cystic/necrotic changes and intrinsic hemorrhage. There is extension of enhancement into ependymal surface of posterior aspect of right l…
18	M	69.0466	04/18/2018	275	Glioblastoma	IDH-WT	unmeth	4	157	140	8	There is a large irregular avidly enhancing mass within the left frontal lobe measuring 4.4 cm in craniocaudal by 4.9 cm in anteroposterior by 4.3 cm in transverse dimension. Areas of central necrosis are present as well as extensive perilesional surrounding T2/FLAIR hyperintensity reflecting edema and/or tumor infiltration which involves the body of the corpus callosum extending to the midline. …
19	F	39.1151	2016-07-12	332	Glioblastoma	IDH-WT	unmeth	4	159	134	11	There is a 5.2 x 5.0 x 3.4 cm (TR, AP, SI) necrotic bifrontal mass intimately related to anterior aspect of corpus callosum in a butterfly configuration. There are multiple foci of restricted diffusion within this lesion. Postcontrast images demonstrates thick peripheral and internal heterogeneous enhancement. There are multiple foci of susceptibility within this lesion, likely represents microhe…
20	F	67.4685	08/10/2018	14	Glioblastoma	NA	unmeth	4	102	90	8	Heterogenous necrotic mass with thick peripheral nodular enhancement is seen in right parietal lobe with internal hemorrhagic staining, measures 4.8 x 4.0 x 4.5 cm. At least 2 satellite enhancing nodular lesions are seen in right parietal lobe, measures 1.3 and 0.9 cm. Extensive surrounding vasogenic edema is seen. Mass effect on ipsilateral right lateral ventricle with 1.0 cm leftward midline sh…
21	M	81.0356	09/01/2017	125	Glioblastoma	IDH-WT	meth	4	133	114	8	The study is partially degraded due to patient motion. There is a 2.6 x 4.2 x 3.2 cm (AP X TR X CC) heterogeneously and T2 hyperintense mass in the left posterior temporal lobe, with areas of restricted diffusion and heterogeneous enhancement. There is associated increased cerebral blood volume. There are few foci of susceptibility artifact within the mass, compatible with intratumoral hemorrhage…
22	F	22.0658	08/10/2018	481	Anaplastic Astrocytoma	IDH-MT	meth	3	85	75	8	There is cortical-subcortical FLAIR high signal in right inferior frontal and insular region, without restricted diffusion or enhancement. The ventricles and sulci are normal in size and symmetric. There is no acute intracranial hemorrhage or acute infarct. There is no mass effect or midline shift. The flow-voids are preserved in the circle of Willis. The basal cisterns are patent. There is no ab…
24	F	43.5397	2011-12-06	#N/A	Diffuse Astrocytoma	IDH-MT	NA	2	122	106	10	Again demonstrated is a focus of T2/FLAIR signal abnormality within the right inferior temporal and fusiform gyri. In addition, there is stable thickening of the adjacent gyri. The lesion demonstrates no appreciable enhancement. There is stable distortion of adjacent white matter tracks on DTI sequences. The size and configuration of the ventricular system and cortical sulci is within normal limi…
25	F	62.7425	03/15/2018	302	Diffuse Astrocytoma	IDH-MT	meth	2	164	148	13	There is a 3.6 x 3.9 x 3.8 cm T2 hyperintense mass within the right frontal lobe demonstrating significant surrounding edema. The mass appears to have multiple septations within it. The postcontrast images do not demonstrate any significant enhancement of the mass. The findings are concerning for a primary brain malignancy. Metastasis considered unlikely as there is no enhancement. There is a pro…
26	F	75.1699	2017-01-26	146	Glioblastoma	IDH-WT	meth	4	225	203	14	Within the right parietal lobe there is a 3.8 x 3.2 x 4.3 cm (anteroposterior x transverse x craniocaudal) intra-axial mass with a moderate amount of adjacent vasogenic edema. Arterial phase imaging does not demonstrate any definite arterial feeding vessel. On postcontrast imaging, the mass demonstrates peripheral rim enhancement as well as a few small superficial draining vessels. The mass conta…
29	F	70.5425	09/03/2017	201	Glioblastoma	IDH-WT	meth	4	160	137	12	There is a 3.1 x 2.1 x 2.3 cm (AP X transverse X craniocaudal) T1 hypointense, T2/FLAIR homogenously enhancing intra-axial mass within the left frontal lobe with associated diffusion restriction. No corresponding susceptibility artifact on susceptibility weighted imaging. There is minimal surrounding FLAIR signal hyperintensity in the left superior frontal gyrus. There is suggestion of some incre…
31	M	57.211	2017-06-05	420	Anaplastic Oligoastrocytoma	IDH-WT	unmeth	3	122	110	6	Images are aerated by motion artifact. There is an ill-defined heterogeneously enhancing cystic and solid mass within the left temporal and parietal lobes extending into the left basal ganglia measuring measuring approximately 5.2 x 9 x 4.5 cm. The mass is contiguous with the left lateral ventricle where there is accompanying subependymal enhancement as seen on series 15, image 17. There are mult…
32	F	41.274	12/23/2017	2570	Oligodendroglioma	IDH-MT	meth	2	131	105	10	An approximately 2 cm area of T2/FLAIR signal abnormality is noted within the right superior frontal gyrus, involving the white and gray matter, minimally increased as compared to multiple prior Is dating back to , without evidence of postcontrast enhancement, suggestive of low-grade glioma. There is no intracranial hemorrhage or major vascular distribution infarct. No abnormal enhancement is see…
33	M	78.6877	2017-01-09	103	Glioblastoma	IDH-WT	unmeth	4	218	209	8	Anterior left temporal lobe intra-axial mass is new since the CT scan of and consists of a complex 2 mm thickness rim enhancement measuring 40 x 29 x 23 mm and containing tiny focus of diffusion restriction and a tiny focus of susceptibility hypointensity within the anterior portion. Moderate edema signal extends posterior to the mass in the adjacent left temporal lobe white matter. No other enha…
34	F	91.2411	04/15/2018	66	Anaplastic astrocytoma	IDH-WT	meth	3	254	223	15	There is confluent abnormal gyral thickening and homogeneous enhancement along the location of the previously noted FLAIR hyperintensity involving the right temporal lobe, insula and gangliocapsular region. Foci of discontinuous nodular enhancement ranging from 6-9 mm in size are seen just posterior to the large confluent focus of abnormal enhancement within the right temporal lobe (series 11 ima…
35	F	65.1123	04/06/2016	311	Diffuse astrocytoma	IDH-WT	unmeth	2	209	185	14	Corresponding to regions of hypodensity on recent CT, there is abnormal T2/FLAIR signal in the left frontal lobe, left insula, left internal capsule, and to lesser degree in left midbrain and pons along the cortical spinal tracts as well as anterior left temporal lobe with predominant involvement of the white matter and also involves cortex in the insular region. There is associated mild sulcal e…
36	M	37.6356	2015-06-04	#N/A	Glioblastoma	IDH-WT	NA	4	70	58	7	Peripherally enhancing left parietal lesion measuring 3.1 x 2.8 x 3.0 cm lesion is noted. There is a slightly lesser nodular component inferiorly (5, 108). There is adjacent vasogenic edema. There is mild mass effect without midline shift. There is suggestion of a developmental venous anomaly, displaced anteriorly by the edema. No other abnormal enhancement is noted. No hydrocephalus.
37	M	79.5589	10/29/2017	408	Glioblastoma	IDH-WT	unmeth	4	240	200	12	There is FLAIR/T2 signal abnormality of the left temporal lobe (image 12, series 7), with extension to the left insular cortex, and without associated restricted diffusion or enhancement. There is also ipsilateral lateral thalamic and isthmus of the cingulate gyrus involvement, with hyperintensity on DWI imaging without restricted diffusion on ADC. There is possible associated dural enhancement (…
38	M	82.6767	04/25/2018	28	Glioblastoma	IDH-WT	unmeth	4	105	91	9	Examination is limited by motion artifacts. An enhancing mass with intrinsic hemorrhage is seen in right parietooccipital region, measures 2.5 x 2.1 x 1.9 cm with surrounding vasogenic edema. No other additional enhancing mass lesion or vasogenic edema is identified, within limitations of motion artifacts. The ventricles and sulci are prominent consistent with volume loss. There is no acute intra…
39	M	67.5123	2017-09-19	121	Glioblastoma	IDH-WT	unmeth	4	226	199	11	Multiple centrally necrotic intra-axial masses are identified throughout the right parietal occipitotemporal region, with a dominant lesion located within the right temporoparietal region, measuring up to 1.6 x 4.2 x 2.2 cm (AP X TRV X CC) (image 82 series 4), and which demonstrates nodular enhancement along the posterior margin of the lesion. Additionally, one of the lesions in the right perihip…
40	F	70.4877	2017-08-28	90	Glioblastoma	IDH-WT	unmeth	4	208	179	10	There is an intra-axial mass lesion in the right basal ganglia/anterior temporal lobe, which is difficult to measure, although spans a length of at least 6 cm when measured continuously in the sagittal plane, demonstrating irregular peripheral enhancement and central cystic change/necrosis. Moreover, areas of restricted diffusion centrally likely relate to hypercellularity or blood products. Ther…
41	M	50.4247	2016-02-02	265	Glioblastoma	IDH-WT	unmeth	4	181	159	8	Again demonstrated is a heterogeneously enhancing mixed multicystic and solid mass in the right frontoparietal lobe measuring 4.1 x 3.7 x 3.3 cm (transverse by AP by cc). There are 2 small 4 to 5 mm adjacent enhancing satellite nodules along the posterior medial margin. There is a focal region of nodular leptomeningeal enhancement suspicious for leptomeningeal spread of disease (series 5, images …
42	M	69.5589	2016-04-09	342	Glioblastoma	IDH-WT	unmeth	4	117	105	7	There is a 3.8 x 3.2 x 2.8 cm heterogeneous mass with heterogeneous restricted diffusion in the left temporal lobe which effaces the left lateral ventricle posterior horn with associated vasogenic edema in the adjacent white matter. Susceptibility artifacts seen throughout the mass likely secondary to blood products. Mildly dilated ventricles with T2 signal in the periventricular white matter of …
43	M	76.7836	2017-03-05	240	Glioblastoma	IDH-WT	unmeth	4	105	93	7	There is a 4.7 cm peripherally enhancing extra-axial mass centered in the left occipital lobe. There are central areas of nonenhancement with no significant restricted diffusion. There is associated mild locoregional mass effect causing effacement of the occipital and temporal horns of the left lateral ventricle. Abnormal T2/FLAIR signal extending from the mass involves the left temporal lobe, sp…
44	F	77.0164	2015-11-21	114	Glioblastoma	IDH-WT	meth	4	192	170	10	There is a 5.1 x 3.8 x 5.3 cm (AP x TR x CC) heterogeneous mass in the left frontal lobe which demonstrates a peripheral rim of thickened nodular enhancement, with central necrosis and associated subtle intrinsic T1 hyperintensity and susceptibility effect consistent with hemorrhage. There is extensive surrounding FLAIR signal hyperintensity extending into the left frontal, parietal, and temporal…
45	F	33.611	07/21/2018	199	Diffuse Astrocytoma	IDH-MT	meth	2	126	113	8	In the right frontal lobe mild there is a 7.1 x 6.7 x 5.1 cm (AP X TRV X CC) multilobulated predominantly T2 bright mass with a small central irregular focus of enhancement and demonstrating no restricted diffusion. It exerts mass effect with resultant 10 mm right to left to right midline shift and effacement of the frontal horn of the right lateral ventricle. There is no acute infarct or hemorrh…
46	M	53.2438	2015-11-07	362	Glioblastoma	IDH-WT	unmeth	4	65	59	3	Compared to the brain from an outside institution, there is similar appearance of the cystic 5 cm peripherally enhancing mass centered within the left parietal lobe with associated surrounding vasogenic edema, adjacent sulcal effacement, and mass effect upon the left lateral ventricle. There is irregular nodular thickening along the medial aspect of the cyst. No additional lesions are identified.
47	F	48.2521	03/26/2013	237	Glioblastoma	IDH-WT	meth	4	435	385	30	There is a new, dural-based enhancing lesion in the left frontal region which measures 3.7 (AP) x 3.5 (TR) x 3.3 (CC) cm in greatest dimensions. This exhibits mass effect on the underlying left frontal lobe. There is vasogenic edema within the adjacent portions of the left frontal lobe. This likely represents a large meningioma. There is a focal area of dural thickening along the right tentorium …
48	M	65.2438	08/31/2018	430	Glioblastoma	IDH-WT	meth	4	186	162	10	There is a large, intra-axial, centrally necrotic contents avidly enhancing mass centered in the right temporal lobe, which measures 6.2 x 6.0 x 4.8 cm (AP by TRV by CC). There is large amount of associated perilesional and white matter edema with mass effect, which results in effacement of the right lateral ventricle and a 1.3 cm contralateral midline shift. There is internal restricted diffusio…
49	M	73.8986	09/29/2018	306	Glioblastoma	IDH-WT	unmeth	4	132	115	10	Nonvascular Brain Parenchyma: There is a 4.5 x 2.8 x 3 cm enhancing mass of the right occipital and parietal lobe. This has patchy central nonenhancement and surrounding edema. This contains one or 2 punctate areas of susceptibility dropout compatible with microhemorrhage. There is enlargement of the splenium of the corpus callosum with T2 hyperintense and T1 hypointense signal crossing the midli…
50	M	70.9616	01/05/2018	262	Glioblastoma	IDH-WT	unmeth	4	158	133	10	Diffuse areas of T2 prolongation noted in bilateral centrum semiovale, involving the subcortical white matter of bilateral parietal and frontal lobes, extending into the left periatrial region of the left lateral ventricle as well as in the occipital lobe and the bilateral internal and external capsules. A ring-enhancing lesion is noted in the right periatrial location of the parietal lobe, measu…
51	M	71.1014	11/25/2017	414	Glioblastoma	IDH-WT	meth	4	129	114	8	A 5.3 x 4.0 x 5.1 cm (AP X TRV X CC) mixed cystic and solid intra-axial mass centered within the left parietal lobe is identified (image 121 series 19). The solid portion of the mass demonstrates diffusion restriction and mild heterogeneous enhancement. There is marked mass effect upon the adjacent brain parenchyma, left aspect of the splenium of the corpus callosum as well as along the left peri…
52	F	56.789	2014-12-12	1278	Glioblastoma	IDH-WT	meth	4	184	164	11	There is a somewhat lobular, vascular rim-enhancing mass seen in the left parieto-occipital region which abuts the meninges. This measures craniocaudal 4.0 cm by AP 4.6 cm by transverse approximately 3.4 cm in size. The margins are somewhat irregular. As noted there are scattered areas of flow void within consistent with considerable vascularity. Absent enhancement centrally with a relatively uni…
53	F	77.3425	09/27/2018	34	Glioblastoma	IDH-WT	unmeth	4	226	205	12	There is a large centrally necrotic mass with surrounding nodular peripheral enhancement centered in the left anterior paraventricular region within the frontal lobe, suggestive of a glioblastoma multiforme. There is central T2 hyperintensity within the lesion along with foci of intralesional hemorrhage within the corpus callosum in the midline. There is redemonstration of additional regions of h…
54	F	74.2603	2016-08-30	169	Glioblastoma	IDH-WT	meth	4	219	192	12	A heterogeneous FLAIR, heterogeneously enhancing lesion centered in the right temporal lobe measures 5.7 x 4.7 cm (AP by TV). This lesion extends to the dura along the anterior aspect of the right middle cranial fossa, which appears thickened and enhances. Trace enhancement is also seen along the ependymal surface of the temporal horn of the right lateral ventricle (image 92, series 3). A promine…
55	M	63.0192	02/12/2018	218	Anaplastic Oligodendroglioma	IDH-MT	meth	3	128	112	10	Again seen is an ill defined, intra-axial lesion in the left frontal lobe. Accurate measurement of this lesion is limited due to the presence of perilesional edema. It measures approximately 1.7 x 1.9 x 2.4 cm (series 7, image 24 and series 8, image 9). There is minimal vague enhancement on postcontrast images and without restricted diffusion. There is associated susceptibility artifact correspon…
56	M	62.5863	2015-11-08	504	Glioblastoma	IDH-WT	meth	4	110	95	7	Hematoma in right temporoparietal region again demonstrates thick peripheral enhancement along its lateral aspect which has increased in size measuring 3.9 x 1.9 x 4.1 cm (AP, TR, CC; previously 3.2 x 1.6 x 3.5 cm). Peripheral rim-enhancing cysts surrounding hematoma have slightly increased in size. Extensive surrounding vasogenic edema has progressed. There is mass effect on ipsilateral right la…
57	M	67.5562	09/25/2018	428	Glioblastoma	IDH-WT	meth	4	252	221	13	There is an intra-axial heterogeneously enhancing mass centered in the left occipital lobe extending to the ependymal surface of the left lateral ventricle occipital horn (best seen on series 11 image 100). The mass measures 4.3 x 4.7 x 4.3 cm (anteroposterior x transverse x craniocaudal), resulting in mass effect and anterior displacement of the left lateral ventricle occipital horn. It has an i…
58	M	55.3233	2016-01-10	1006	Glioblastoma	IDH-WT	unmeth	4	155	133	11	Brain Parenchyma: In the paramedian right parieto-occipital lobe, there is a heterogeneously enhancing 3.6 cm x 2.9 cm mass (postcontrast image 21 series 10). This demonstrates intrinsic T1 hyperintensity as well as associated decreased signal on susceptibility weighted images along its right side and dependently, consistent with internal hemorrhage. There is mild surrounding edema. There is loca…
59	M	56.1836	2016-10-06	169	Glioblastoma	IDH-WT	unmeth	4	205	181	10	There is a 2.1 x 2.6 x 2.7 cm enhancing mass in the right frontal lobe which demonstrates restricted diffusion, increased perfusion and contains cystic low attenuation areas centrally. Blooming in SWI within this lesion likely represents microhemorrhages. There is significant vasogenic edema involving the right frontal lobe with 7 mm of right to left midline shift and subfalcine herniation. There…
61	M	67.1178	2018-12-07	31	Glioblastoma	IDH-WT	unmeth	4	162	144	7	Again seen are 2 enhancing lesions in the left basal ganglia demonstrating restricted diffusion, the larger measuring up to 2.5 cm, which is stable in size, although now demonstrates slightly decreased peripheral enhancement including discontinuous enhancement along its anterior margin. The smaller satellite lesion anteriorly appears slightly increased in size when compared with the prior postcon…
62	M	54.1123	08/18/2018	42	Glioblastoma	IDH-WT	unmeth	4	160	142	14	There is redemonstration of a large 5.8 x 4.2 x 5.2 cm T1 isointense, T2 hyperintense mass in the right parietal and occipital lobes, with mass effect on surrounding structures. No evidence of a midline shift. The mass is predominantly peripherally enhancing. There is intimate association with the atrium of the right lateral ventricle. There is no evidence of associated restricted diffusion. Line…
63	F	64.1753	09/06/2018	209	Glioblastoma	IDH-WT	unmeth	4	277	246	16	There are multiple areas of signal abnormality on FLAIR within the cerebral cortex and white matter involving predominantly the right hemisphere with associated mass effect, with specific abnormalities as follows: Extensive involvement of the right temporal lobe area with mass effect Right temporal lobe white matter and right hippocampus. Right parietal lobe with mass effect. Right insula Right t…
64	M	62.2849	12/04/2016	550	Glioblastoma	IDH-WT	unmeth	4	146	124	10	There has been interval progression of FLAIR signal alteration involving the right temporal lobe, insular region and right frontal operculum. A ring-enhancing focus projecting within the right inferior temporal gyrus has increased in size measuring 10 x 14 x 10 mm (series 13, image 123) compared to 7 x 10 x 8 mm on prior imaging. An additional area of ill-defined enhancement projecting within the…
66	M	63.2137	02/23/2017	405	Glioblastoma	IDH-MT	meth	4	309	272	17	Within the right frontal lobe there is redemonstration of an ill-defined, heterogeneously enhancing infiltrating lesion with a region of irregular/thickened peripheral enhancement and centrally necrotic regions. The enhancement is noted to extend along the rostrum and genu of the corpus callosum. In addition, there are several adjacent foci of contrast enhancement, predominantly at the anteromedi…
67	M	32.874	2016-11-01	764	Anaplastic Astrocytoma	IDH-MT	meth	3	101	83	9	Infiltrative, 6 cm relatively homogeneous, nonenhancing medial left frontal lobe mass with associated gyral swelling/mild vasogenic edema. No associated restricted diffusion in. Adjacent prominent vessels may represent an incidental small developmental venous anomaly. The basal cisterns are patent. No midline shift, intracranial hemorrhage or major vascular distribution infarct. Ventricles: The v…
68	F	71.2329	10/05/2018	429	Glioblastoma	IDH-WT	meth	4	156	139	12	brain without and with contrast . There is a left frontal heterogeneous but predominantly peripherally enhancing mass which measures 1.9 x 1.4 x 1.9 cm (AP x TV x CC). Mass is located in the corona radiata and demonstrates peripheral diffusion restriction. There is surrounding T2/FLAIR hyperintensity consistent with edema. Additional smaller ill-defined nodules of enhancement are present inferola…
69	F	42.5151	08/09/2016	892	Diffuse Astrocytoma	IDH-MT	meth	2	144	124	8	There is a 3.3 x 3.0 x 0.0 cm predominantly T FLAIR hyperintense mass expanding the left post central gyrus with mild central reduced diffusivity, a small cystic component along the medial margin and 4 mm nodular enhancement along the anterolateral margin. There is surrounding less masslike FLAIR hyperintensity which may reflect infiltrating tumor and/or vasogenic edema. There is punctate associa…
70	M	40.3068	03/08/2014	1067	Glioblastoma	IDH-WT	meth	4	95	81	8	There is a 2.4 x 2.7 x 2.6 cm T1 hypointense, T2 hyperintense intra-axial mass in the right postcentral gyrus. The mass partially suppresses on FLAIR imaging and demonstrates irregular, somewhat nodular peripheral enhancement. Additionally there are thin enhancing septa within the mass. There is a small amount of surrounding T2/FLAIR FLAIR signal. There is no evidence of restricted diffusion. The…
71	M	63.4685	2018-05-08	273	Glioblastoma	IDH-WT	unmeth	4	161	139	10	There is a 2.2 x 1.8 x 2.0 cm (AP X transverse X craniocaudal) heterogeneously enhancing partially cystic/necrotic mass within the right centrum semiovale. A small 4 mm enhancing satellite nodule is seen slightly anterior and lateral to the mass. There is a second somewhat smaller 1.8 x 2.0 x 1.6 cm partially cystic/necrotic heterogeneously enhancing mass within the right posterior cingulate gyru…
73	F	46.3342	02/05/2017	661	Oligodendroglioma	IDH-MT	meth	2	115	102	10	There is a large infiltrative mass centered predominantly within the white matter of the right superior frontal gyrus which extends into and expands the adjacent cortex which demonstrates extensive FLAIR signal alteration. There is thin discontinuous diffusion restriction and questionable minimal enhancement at the margins of the T1 hypointense, T2 hyperintense central component. No evidence of a…
74	M	67.1699	12/28/2017	448	Glioblastoma	NA	meth	4	182	163	8	There are a cluster of ring enhancing masses within the right frontal lobe with associated vasogenic edema resulting in a 5 mm right-to-left midline shift. For example, the largest, most rostral mass in the centrum semiovale measures 2.6 x 2.7 x 3.7 cm. Additional masses are noted within the right corona radiata and lentiform nucleus and the left corpus callosum body extending to the cingulate gy…
75	F	6.21644	2017-08-10	273	Diffuse midline glioma, H3 K27M-mutant	IDH-WT	unmeth	4	198	173	12	There is a heterogeneously enhancing (prominent nonenhancing component centrally), irregular, expansile mass centered in the left hemipons with surrounding FLAIR hyperintensity which extends superiorly into the left cerebral peduncle up to the level of the thalamus, and inferiorly to the medulla junction. There is increased perfusion on perfusion imaging. There is minimal diffusion restriction. T…
76	F	50.4466	11/25/2017	433	Glioblastoma	IDH-WT	meth	4	159	135	12	There is been no significant interval change in the size of the predominantly cystic, peripherally enhancing mass in the medial right temporal lobe, which measures approximately 2.5 x 2.4 x 2.4 cm. There is a small amount of hemorrhage in the anterior and posterior aspects of the lesion, which is new from prior study. Again seen is surrounding FLAIR hyperintensity, reflecting edema and/or tumor i…
77	F	21.2685	2017-07-27	518	Diffuse Astrocytoma	IDH-MT	meth	2	91	79	6	A 1.0 x 1.5 x 2.1 cm (TRV x AP X CC) area of abnormal FLAIR signal is noted within the subcortical white matter of the right superior frontal gyrus (image 27 series 7), with associated expansion of the adjacent brain parenchyma. The ventricles and sulci are normal in size and symmetric. There is no acute intracranial hemorrhage or acute infarct. There is no midline shift. The basal cisterns are p…
78	F	31.389	2016-06-30	932	Diffuse Astrocytoma	IDH-MT	meth	2	166	145	12	Large cystic mass is noted in the left temporal lobe extending into the left inferior frontal lobe measuring approximately 5.8 x 4.5 x 5.3 cm with minimal surrounding edema. There is locoregional mass effect on surrounding sulci, with partial effacement of the left lateral ventricle, midline shift of approximately 6 mm and early left uncal herniation. The left M1 branch and proximal left M2 branc…
79	M	72.6	2016-09-21	711	Glioblastoma	IDH-WT	NA	4	193	174	10	There is a 3.6 TR x 3.2 cm AP x 3.5 cm CC mass centered in the left frontal lobe which demonstrates peripheral and central enhancement with irregular wall. The mass crosses midline to the right by approximately 1 cm, with extensive hyperintense T2/FLAIR signal in the adjacent left frontal lobe and to a lesser extent medial aspect of the right frontal lobe, including the genu of the corpus callosu…
80	F	68.7233	2017-07-25	351	Glioblastoma	IDH-WT	unmeth	4	69	61	6	Irregular, right frontal rim-enhancing enhancing lesion with central necrosis is again noted. There is marked surrounding vasogenic edema extending as far back as the postcentral gyrus. There is associated mass effect. This appears to involve the corpus callosum. The tumor extends to the periventricular tissue, no definitive ependymal or leptomeningeal enhancement noted. The paranasal sinuses and…
81	F	63.4822	2018-04-27	262	Glioblastoma	IDH-WT	unmeth	4	218	192	9	Brain Parenchyma: Prominent 2.8 x 3.2 x 3.2 cm (AP x TR x CC) anterior right frontal lobe mass with thickened nodular enhancement, most compatible with a high-grade neoplasm, likely an anaplastic astrocytoma or glioblastoma. There is associated marked amount of perilesional edema within the right frontal lobe as well as mass effect on the adjacent parenchyma, subfalcine herniation/midline shift t…
82	M	57.0904	09/07/2016	923	Diffuse Astrocytoma	IDH-MT	meth	2	103	90	7	Brain Parenchyma: There is an approximately 3.5 x 3.1 x 2.8 cm nonenhancing cortical based T1 hypointense and T2 hyperintense lesion in the left frontoparietal lobe with small area of T1 hypointensity with small central cystic area. There is no restricted diffusion. There is mild associated mass effect without midline shift. There are old infarcts in right basal ganglia and bilateral periventricu…
83	F	63.4192	08/19/2016	880	Glioblastoma	IDH-WT	meth	4	237	207	11	There is a predominantly T2 hyperintense, well-defined, lobular intra-axial mass centered in the left perirolandic cortex demonstrating avid, somewhat heterogeneous postcontrast enhancement with scattered internal areas of cystic change/necrosis, measuring approximately 3.6 x 2.8 x 3.7 cm (ap x trv x cc), along with localized mass effect and sulcal effacement with minimal effacement of the body o…
84	M	46.7671	09/26/2013	#N/A	Oligodendroglioma	IDH-MT	NA	2	118	102	7	T1 hypointense and heterogeneously T2 hyperintense lesion centered within the fusiform gyrus of the left temporal lobe measuring 4.3 x 3.0 x 2.6 cm (AP by transverse by CC) demonstrates no appreciable postcontrast enhancement. This lesion is expansile and results in superomedial displacement of the medial temporal lobe which does not demonstrate direct extension of the lesion. Minimal T2/FLAIR hy…
85	M	37.5753	2016-05-26	117	Anaplastic Oligodendroglioma	IDH-MT	unmeth	3	239	208	13	Centered within the left inferior frontal lobe, large heterogeneously enhancing mass measuring 8.0 x 6.2 x 5.9 cm (AP x TRV x CC) with extensive surrounding vasogenic edema resulting in rightward subfalcine herniation of 1.1 cm as well as mass effect compressing the third ventricle resulting in obstructive hydrocephalus with transependymal flow. Components of this mass involves the left basal gan…
87	M	61.7151	2014-05-06	1574	Oligodendroglioma	NA	meth	2	164	151	11	Redemonstrated is a stable focal confluent T FLAIR hyperintensity within the right subinsular region involving the right external capsule anterior lateral aspect of the right basal ganglia and extending inferiorly into the anterior aspect of the right temporal lobe with extension into the anterior right temporal lobe. There is no evidence of enhancement within this region or within the remaining …
88	F	62.2575	08/29/2017	81	Glioblastoma	IDH-WT	meth	4	239	213	12	There is a heterogeneous enhancing mass within the right temporal lobe with areas of cystic necrosis extending into the basal ganglia measuring approximately 6 cm in anteroposterior by 5 cm in craniocaudal by 4.5 cm in transverse dimension. Scattered areas of intrinsic T1 hyperintensity and low signal intensity are present on the susceptibility weighted sequences consistent with areas of calcific…
89	F	50.0384	09/01/2018	457	Glioblastoma	IDH-WT	meth	4	141	122	10	There is a 3.1 x 2.3 x 3.1 cm (AP X TRV X CC) heterogeneously enhancing lesion in the left superior frontal gyrus. It is located adjacent to the falx on the left and the anterior portion of the superior sagittal sinus. There is T2 hypointense and nonenhancing components, which may represent intralesional necrosis. The solid and enhancing components also demonstrates slight restricted diffusion, s…
91	F	51.2301	11/03/2017	569	Oligodendroglioma	IDH-MT	meth	2	109	99	9	There is a stable appearance of T2 hyperintense cortical-based lesion in the right middle frontal gyrus measuring approximately 0.9 cm without contrast enhancement. There is a small amount of surrounding FLAIR hyperintensity. There is no diffusion restriction or susceptibility artifact to suggest active infarct or hemorrhage. There is no abnormal parenchymal contrast enhancement. The ventricles a…
92	M	53.1233	08/02/2018	499	Glioblastoma	IDH-WT	meth	4	149	132	7	There is a 6.0 x 4.2 x 4.8 cm (AP X TRV X CC) nodular peripherally enhancing mass with central necrosis centered in the right temporal lobe, with extensive surrounding FLAIR signal abnormality which extends to the right frontal and parietal lobes. There is resulting mass effect with effacement of the right hemispheric sulci, right lateral ventricle, and a resultant 17 mm right-to-left midline shi…
93	M	33.7425	07/28/2017	536	Diffuse Astrocytoma	IDH-MT	meth	2	117	103	10	Cortical based enhancing lesions are seen in right inferior temporal gyrus, measures 1.9 x 1.1 cm and in posterior aspect of right parahippocampal gyrus measures 1.3 x 0.5 cm with extensive vasogenic edema in right temporal lobe. No definite restricted diffusion, increased perfusion or hemorrhage is seen in right temporal lobe. No other additional lesion is identified. There is no hydrocephalus. …
94	M	56.8137	05/07/2015	#N/A	Glioblastoma	NA	NA	4	190	168	12	A 4.4 x 4 cm mass is noted in the right frontal lobe, which is predominantly hypointense on T1 with central areas of hyperintensity, suggestive of hemorrhage. The lesion is predominantly hyperintense on T2, FLAIR images with peripheral hypointense rim. Post contrast images demonstrates 3.4 x 3 cm irregular heterogeneous enhancement in the anterior aspect of the lesion with peripheral marginal enh…
95	F	39.1205	2016-12-04	773	Anaplastic Astrocytoma	IDH-MT	meth	3	193	168	14	There is a large area of FLAIR signal abnormality without enhancement , predominantly centered within the right anterior temporal lobe (including the hippocampus) but also involving the entire right insular lobe, temporal stem, extending to the right sublenticular Apostol and right hypothalamus. The lesion extends through the temporal stem into the posteroinferior right frontal lobe. A mostly inv…
97	M	51.1342	2018-01-29	354	Oligodendroglioma	IDH-MT	meth	2	213	190	12	There is a large infiltrative expansile T1 hypointense, T2/FLAIR hyperintense cortical and subcortical mass like lesion with multiple foci susceptibility weighted artifact reflecting calcifications, centered within the left frontal lobe. The lesion extends inferiorly into the region of the left frontal opercula and left insula as evidenced by abnormal FLAIR signal abnormality as best seen on the …
98	M	76.9096	2015-10-27	157	Glioblastoma	IDH-WT	meth	4	233	197	10	There is an irregular, centrally cystic/necrotic heterogeneously enhancing mass lesion that appears to be intra-axial in location, centered in the right frontal cortex, measuring approximately 4.8 x 2.7 x 3.7 cm (ap x trv x cc), with associated marked locoregional mass effect and sulcal effacement throughout the right cerebral hemisphere. There is extensive surrounding T2/FLAIR hyperintensity in …
99	M	58.5808	2015-11-27	325	Glioblastoma	IDH-WT	unmeth	4	101	84	10	There is a 4.0 x 2.4 x 2.7 cm (AP, TR, CC) necrotic mass in right parietal lobe, which demonstrates thick peripheral enhancement. Perfusion images demonstrates increased rCBV, particularly along its lateral margins. There is hemorrhage and restricted diffusion corresponding to enhancing wall. There is extensive surrounding vasogenic edema. There is no hydrocephalus. There is no acute infarct. The…
100	M	33.2219	2015-12-11	651	Oliogoastrocytoma	IDH-MT	unmeth	2	143	122	13	There is a 1.6 x 0.9 x 1.7 cm enhancing cortically based lesion in the right frontal lobe with adjacent T2/FLAIR hyperintensity, compatible with vasogenic edema, resulting in subjacent sulcal effacement. There is no midline shift. There is no associated restricted diffusion or susceptibility in the lesion. No increased perfusion is noted involving this lesion. There is no evidence of acute infarc…
101	F	30.7014	2016-02-16	1059	Glioblastoma	IDH-WT	meth	4	219	185	7	Within the suprasellar region, distinct from the pituitary gland/infundibulum, there is a large mass measuring 6.4 x 5.7 x 4.5 cm (AP x TRV x CC) which encases/envelops both anterior cerebral arteries without significant displacement and extends superiorly with abnormal signal involving the genu of the corpus callosum and surrounding brain parenchyma (image 36 series 13; image 62 series 14). In a…
102	M	47.8	03/21/2018	240	Glioblastoma	IDH-WT	unmeth	4	176	156	11	There is a large 5.2 x 3.4 x 3.4 cm hemorrhage crossing the midline spanning the frontal lobes centered along the genu of the corpus callosum. The hemorrhage is heterogeneous in signal intensity with mixed magnetic susceptibility, fluid hematocrit levels and intrinsic hyperintense T1 signal consistent with subacute blood products. The intrinsic hyperintense T1 signal limits evaluation for enhance…
103	M	64.3151	01/27/2017	22	Glioblastoma	IDH-WT	meth	4	192	171	11	Postcontrast sequences are motion degraded which limits evaluation. Redemonstration of large mass occupying much of the superior right frontal lobe demonstrating with mixed areas of irregular, patchy and peripheral enhancement, including scattered areas of tumoral necrosis. Magnetic susceptibility within the lesion is consistent with small amounts of hemorrhage. The right frontal lobe mass involv…
104	M	59.1644	2016-12-13	663	Glioblastoma	IDH-WT	meth	4	119	104	6	There is a large irregular enhancing multilobulated lesion centered within the right frontal lobe, containing numerous areas of irregular peripheral enhancement, including a few scattered satellite lesions within the right frontal lobe. Although difficult to measure given its irregular shape, the lesion measures roughly 4.9 x 4.5 x 5.4 cm (AP x TR x CC). In combination with the surrounding hyperi…
105	F	53.1233	2016-03-23	311	Glioblastoma	IDH-WT	unmeth	4	238	209	11	There is a large right frontal parasagittal intra-axial cystic mass measuring approximately 5.6 x 4.8 x 4.3 cm (ap x trv x cc) demonstrating thick, irregular peripheral enhancement, with soft tissue component that is most pronounced along its medial margin. There are also a few foci of peripheral magnetic susceptibility artifact associated with this mass, which may represent blood products. The m…
106	M	77.726	2017-07-10	440	Diffuse Astrocytoma	IDH-WT	unmeth	2	210	184	12	There is extensive FLAIR signal hyperintensity predominantly within the left temporal lobe, but also extending into the left occipital, parietal and frontal lobes. There is a more nodular region of FLAIR signal abnormality inferiorly within the left temporal lobe, best seen on series 100, image 73 and series 3, image 10.. An additional nodular region of FLAIR signal abnormality on series 3, image…
107	F	54.4603	2017-04-07	196	Glioblastoma	IDH-WT	unmeth	4	156	139	8	A 3.2 x 5.8 x 3.5 cm heterogeneous mass with thick irregular peripheral enhancement, increased relative cerebral blood volume, and diffusion restriction is seen in the left frontal lobe, crossing midline through the anterior body of the corpus callosum into the right frontal periventricular white matter. Small foci of susceptibility artifact within this lesion are compatible with hemorrhage. Surr…
108	M	61.2904	11/25/2017	384	Glioblastoma	IDH-WT	unmeth	4	122	106	8	A 4.8 x 3.3 x 3.4 cm (AP X TRV X CC) (image 105 series 11) centrally necrotic and heterogeneously enhancing intra-axial mass centered within the inferior left parieto-occipital region and is inseparable from the left occipital horn. There is no hydrocephalus. A small area of diffusion restriction is noted in the anterolateral aspect of the mass. Additionally, susceptibility artifact is noted alon…
109	M	67.6164	02/25/2018	326	Glioblastoma	IDH-WT	unmeth	4	135	125	8	An area of irregular peripheral contrast enhancement involving the left temporal lobe extending to the left frontal lobe, measuring 3.0 x 2.0 x 2.2 cm with extensive surrounding FLAIR signal with thickening of the overlying sulci and mass effect on the left lateral ventricle with resulting 0.3 cm left-to-right midline shift. The lesion is abutting and superiorly displacing the M2 segment of the l…
110	F	62.7096	2017-05-10	80	Glioblastoma	IDH-WT	unmeth	4	126	116	7	The examination is suboptimal secondary to patient motion. Centered within the right cerebellar hemisphere there is a evidence of peripheral cortically enhancing lesion with gyriform enhancement with abnormal enhancement extending along the right pons as well as enhancement involving right cranial nerves V and VII/VIII. Associated FLAIR signal hyperintensity within the right cerebellar hemisphere…
111	M	59.7726	10/01/2016	618	Glioblastoma	IDH-WT	unmeth	4	123	111	9	Hyperintense signal on FLAIR and T2-weighted sequences is noted within the right superior temporal and operculum of the right frontal lobes with a few foci enhancement within this area on postcontrast images (axial image 14 series 12). There are also patchy foci of restricted diffusion within this area of signal abnormality. Also noted is a focus of susceptibility artifact within this region whic…
112	F	71.1753	2018-12-08	154	Glioblastoma	NA	unmeth	4	159	145	12	There is a large mass infiltrating the left basal ganglia, extending into the right temporal stem and temporal lobe white matter. It demonstrates multiple foci of ring enhancement in the left basal ganglia surrounding areas of probable necrosis. There is extension through the anterior commissure into the right basal ganglia with enhancement. There is some mass effect with decreased size of left l…
113	F	33.2274	12/04/2017	410	Oligodendroglioma	IDH-MT	meth	2	124	107	10	There is a large left frontal lobe intra-axial mass that does not demonstrate any significant enhancement. The mass is ill-defined but measures approximately 5.7 cm AP by 3.6 cm transverse by 7.1 cm craniocaudal. There is extensive surrounding vasogenic edema with extension into the genu of the corpus callosum. There is surrounding mass effect including on the frontal horns. There is restricted d…
114	F	61.2767	2017-06-08	385	Glioblastoma	IDH-WT	unmeth	4	195	176	9	In the right frontal lobe, there is a 4.7 x 3.9 x 3.3 cm intra-axial mass demonstrating thick irregular peripheral enhancement and central nonenhancement likely as a result of necrosis. This mass also demonstrates areas of mild restricted diffusion likely as result of necrosis or increased cellularity, as well as areas of susceptibility artifact likely as result of blood products. The mass extend…
115	M	51.337	10/12/2017	306	Anaplastic astrocytoma	IDH-WT	unmeth	3	111	98	7	Again noted is a right temporal mass with similar surrounding T2/FLAIR hyperintensity extending into the right parietal lobe and posterior aspect of the right basal ganglia. There is similar mass effect on the right lateral ventricle and similar 3 mm leftward midline shift. There is similar mild corresponding restricted diffusion and a small focus of ill-defined enhancement in the medial aspect o…
116	M	58.4082	05/18/2017	361	Glioblastoma	IDH-WT	unmeth	4	228	200	12	There are two enhancing brain lesions as follows: A left frontoparietal paramedian centrally necrotic lesion demonstrating irregular peripheral enhancement, measuring 2.5 x 2.1 x 2.3 cm, with a few subtle adjacent nodular and leptomeningeal enhancing foci. This lesion is also associated with areas of restricted diffusion and susceptibility artifact likely representing blood products. There is ext…
117	M	53.6384	10/31/2018	344	Glioblastoma	IDH-WT	unmeth	4	109	95	10	Necrotic mass is seen in involving splenium of corpus callosum with peripheral nodular enhancement and internal foci of microhemorrhage, measures 5.2 x 3.8 x 2.3 cm. There is surrounding vasogenic edema. No definite increased perfusion is identified. Nonenhancing FLAIR high signal lesions are seen in left corona radiata and left superior frontal gyrus. There is no evidence of hydrocephalus.. Ther…
118	M	24.4301	2017-05-06	615	Anaplastic Oligoastrocytoma	IDH-MT	meth	3	116	98	11	The 3.1 x 2.3 x 3.0 cm (AP, TR, CC) medial right frontal lobe mass with foci of internal necrosis/cystic changes. There are few peripheral and internal nodular enhancing foci. Patchy restricted effusion is seen anteriorly. There is no increased perfusion or susceptibility. There is surrounding FLAIR high signal. There is mild mass effect on the right lateral ventricle. There is no evidence of acu…
120	M	50.9753	05/03/2016	876	Anaplastic Astrocytoma	NA	unmeth	3	192	171	10	Portable/juxtacortical FLAIR signal hyperintensity is again noted involving the left precentral gyrus, left postcentral gyrus, and left paracentral lobule with mild associated diffusion restriction which appears not significantly changed compared with the prior examination. 2 adjacent areas of enhancement are again noted; the superior nodular enhancement appears not significantly changed compared…
121	M	76.2904	11/30/2017	106	Glioblastoma	IDH-WT	unmeth	4	185	165	15	A large 6.2 x 5.3 x 6.8 cm multilobulated heterogeneously enhancing cortically based mass is identified within the right frontal lobe. The enhancing component grossly measures 6.1 x 3.7 x 2.9 cm. There appear to be satellite lesions surrounding the main enhancing component measuring up to 8 mm. The mass abuts the anterior horn of the right lateral ventricle. There is significant surrounding mass …
122	F	53.1973	2016-05-05	301	Glioblastoma	IDH-WT	unmeth	4	202	178	11	There is a large, lobular multiseptated cystic mass in the left anterior temporal lobe measuring approximately 5.6 x 4.1 x 4.5 cm. The majority of the mass demonstrates thin peripheral enhancement, although there is strong heterogeneous solid enhancement along its anterior aspect. There is no associated susceptibility artifact to suggest calcifications or hemorrhage. There is associated locoregio…
123	F	74.0932	09/21/2016	187	Glioblastoma	IDH-WT	meth	4	141	123	8	Within the left corona radiata there is a heterogeneously enhancing 6.4 x 2.7 x 3.2 cm (anteroposterior x transverse x craniocaudal, previously 5.8 x 2.4 x 3.5 cm) intra-axial mass with restricted diffusion which also extends to increasingly involve the body of the corpus callosum. There is no acute infarction, intracranial hemorrhage, midline shift, or herniation. There is cerebral and cerebella…
124	F	82.0192	2016-07-19	270	Anaplastic Oligodendroglioma	IDH-WT	unmeth	3	199	169	12	Within the left parieto-occipital lobe, there are multiple peripherally enhancing centrally necrotic masses, the largest measuring up to 3 cm, and with resultant extensive surrounding vasogenic edema with commensurate mass effect and subadjacent sulcal effacement (image 14 series 14). In addition, several of these lesions have central susceptibility artifact compatible with hemorrhagic blood prod…
125	M	83.611	2017-04-10	91	Glioblastoma	IDH-WT	unmeth	4	164	146	12	There is a 5.7 x 3.8 x 4.3 cm (AP x TR x CC) necrotic mass in right frontal lobe, which demonstrates patchy foci of restricted diffusion and multiple internal punctate foci of susceptibility. The mass tracks into right lateral ventricle frontal horn subependymal region. There is extensive surrounding vasogenic edema with mass effect on ipsilateral right lateral ventricle. There is 10 mm leftward …
126	F	35.9644	2017-04-30	582	Oligodendroglioma	IDH-MT	meth	2	212	184	12	There is a heterogeneously T2 hyperintense mixed solid and cystic cortical/subcortical mass in the right parasagittal frontal lobe, measuring approximately 4.3 x 3.3 x 4.3 cm, with areas of T1 shortening and blooming on susceptibility artifact corresponding to calcifications seen on prior brain CT. There is minimal associated postcontrast enhancement. There is no associated restricted diffusion. …
127	M	59.7507	11/09/2017	426	Glioblastoma	IDH-WT	meth	4	111	103	7	There is a large diffusion restricting and heterogeneously enhancing T2 hyperintense lesion located in the left frontal lobe and insula measuring 6.4 x 4.9 x 6.5 cm which exerts mass effect on the adjacent right lateral ventricle resulting in a 0.8 cm left to right midline shift with a small subfalcine herniation. Areas of susceptibility artifact are present within the tumor likely representing s…
128	M	53.1973	2017-04-10	604	Glioblastoma	IDH-WT	meth	4	136	115	11	There is a 4.4 x 2.9 x 4.6 cm (AP, TR, CC) carotid mass with peripheral nodular enhancement in right frontal centrum semiovale. There is mild surrounding vasogenic edema. There is mass effect on corpus callosum and lateral body of right lateral ventricle. There is intrinsic and peripheral nodular discontinuous hemorrhage. There is internal inhomogeneous restricted diffusion, some of which is like…
129	F	20.1123	2017-01-18	786	Diffuse Astrocytoma	IDH-MT	meth	2	129	106	10	Redemonstrated T2/FLAIR hyperintense masslike lesion occupying most of the left insula as well as the external capsular and exiting stable mass effect on the basal ganglia. There is no mass effect, edema, or midline shift. There is no intracranial hemorrhage or major vascular distribution infarct. No abnormal intracranial enhancement is seen. Ventricles: The ventricles are symmetric and normal in…
130	M	51.9452	02/12/2017	690	Glioblastoma	IDH-WT	meth	4	103	87	9	Partially necrotic mass is seen in right frontal lobe (measures 4.0 x 3.6 x 2.9 cm; AP, TR, CC), which demonstrates intrinsic foci of hemorrhage and restricted diffusion. There is peripheral enhancement and increased cerebral blood volume. There is surrounding edema which also extends into right external capsule. There is no hydrocephalus. There is no acute infarct. There is no mass effect or mid…
131	M	23.5123	2017-05-09	615	Diffuse Astrocytoma	IDH-MT	unmeth	2	139	120	10	Extensive T2/FLAIR hyperintense area is noted, involving left parietal lobe as well as the temporal lobe and occipital lobe. There is a extension of the mass like T2/FLAIR hyperintense signal through the splenium of the corpus callosum into the medial portion of the right occipital lobe. The signal involves both the gray and white matter including the left thalamus. No evidence of areas of restri…
135	F	59.4521	07/28/2017	195	Glioblastoma	IDH-WT	unmeth	4	163	147	8	Again demonstrated is a 4.7 x 3.2 x 2.6 cm intra-axial mass within the left temporal lobe/insula with nodular rim enhancement and central areas of necrosis. An additional rim-enhancing 1.2 x 1.1 cm centrally necrotic satellite lesion is identified posterior to the dominant mass within the posterior left temporal lobe (image 83 series 11). Abnormal FLAIR signal is also noted within the left inferi…
139	M	63.5068	2017-11-12	140	Glioblastoma	IDH-WT	meth	4	147	132	10	There is a dural based right temporal mass measuring 4.0 x 3.1 cm, which demonstrates patchy central necrosis, predominantly restricted diffusion. Few foci of intrinsic and peripheral microhemorrhage is seen. The lesion demonstrates avid dural tail. This mass is hyperdense is CT examination. Along the medial aspect of this dural based mass, there is multiseptated 4.5 x 1.7 cm intra-axial mass wit…
140	M	59.0767	12/04/2018	399	Glioblastoma	IDH-WT	unmeth	4	248	216	15	Brain Parenchyma: There is a 4.6 x 2.7 x 3.6 cm (AP, TR and cc dimensions) rim-enhancing lesion with some peripheral nodularity in the right posterior parietal lobe, extending into the splenium of corpus callosum. There is associated enhancement of the falx adjacent to this lesion. There is associated vasogenic edema and mass effect and the adjacent sulci and the occipital horn of the right later…
141	F	55.6247	2018-02-07	224	Glioblastoma	IDH-WT	unmeth	4	184	155	10	There is a 4.6 x 3.6 x 3.2 cm mass in the right temporal lobe with irregular peripheral enhancement, and surrounding T2/FLAIR hyperintensity. This finding appears slightly increased in size from 1/2 when it measured approximately 3.9 x 3.3 x 3.1 cm, and has markedly enlarged from 1 and . There is also a 2.1 x 1.9 x 2.0 cm mass in the posterior right frontal lobe with surrounding T2/FLAIR hyperint…
142	F	69.0329	2018-01-26	75	Glioblastoma	IDH-WT	unmeth	4	151	134	11	There is redemonstration of a 3.9 x 2.6 x 2.2 cm (AP X transverse X craniocaudal) heterogeneous peripherally rim-enhancing mass within the left temporal lobe. The mass nearly completely effaces the occipital horn of the left lateral ventricle. There is associated nodular enhancement of the ependymal lining of the ventricle suggestive of ependymal spread of disease. There is no associated hydrocep…
144	M	14.0603	2018-03-29	295	Glioblastoma	IDH-WT	meth	4	208	174	12	There is a T1 predominantly isointense/T2 heterogeneous acute/subacute intraparenchymal hematoma identified within the left anterior temporal lobe, measuring approximately 20 x 18 mm (image 6 series 2). There is however an additional cystic lesion identified along the inferior aspect of the hematoma and which measures approximately 16 x 13 mm (AP x TRV). T1 isointense/T2 hyperintense lesion with …
145	F	66.0247	04/13/2018	271	Glioblastoma	IDH-WT	meth	4	142	121	9	There is a probably intra-axial irregularly enhancing mass within the right perirolandic region at the vertex measuring 2.0 cm in craniocaudal by 1.7 cm in anteroposterior by 2.0 cm in transverse dimension. There is extensive surrounding T2/FLAIR hyperintensity which may reflect edema and/or tumor infiltration. A few foci of low signal intensity blooming are present on the susceptibility weighted…
146	M	82.863	2018-06-06	239	Glioblastoma	IDH-WT	unmeth	4	187	165	15	Portions of the exam are degraded by motion. Redemonstration of a right frontal rim-enhancing lesion measuring approximately 3.5 cm, image 70 of series 21, with marked surrounding vasogenic edema. There is surrounding mass effect with up to 7 mm leftward midline shift and early subfalcine herniation. Focal susceptibility noted along the right frontal pole suggesting blood products. Perfusion imag…
147	F	62.7014	06/17/2018	66	Anaplastic Oligodendroglioma	IDH-MT	meth	3	171	155	9	Please note the examination is mildly degraded by patient motion artifact. Again demonstrated is a mixed cystic and solid intra-axial lesion centered within the medial right frontal lobe with enhancing mural nodule measuring approximately 16 x 25 x 18 mm (image 122 series 102). The cystic portion of the mass is difficult to resolve from the right anterior horn and appears to extend inferiorly int…
148	F	57.7699	2018-06-22	229	Glioblastoma	IDH-WT	meth	4	182	153	10	The study is somewhat limited by motion artifact. There is a solid and partially cystic/hemorrhagic heterogeneously enhancing right paramedian frontal intra-axial mass, measuring approximately 5.3 x 3.6 x 5.6 cm, abutting the falx, which is thickened and enhancing, and resulting in regional sulcal effacement/crowding. There is surrounding T2/FLAIR hyperintense signal in the right frontal lobe, wh…
149	M	56.6603	07/17/2018	203	Glioblastoma	IDH-WT	unmeth	4	136	121	10	Heterogeneously enhancing and diffusion restricting lesion centered at the right temporal lobe measuring 4.8 x 3.8 cm with extensive surrounding FLAIR hyperintensity is noted. There is a resulting 0.9 cm right to left midline shift with effacement of the right lateral ventricle. The lesion appears to be tracking towards the occipital horn of the right lateral ventricle with enhancement along the …
150	F	63.2904	07/25/2018	128	Glioblastoma	IDH-WT	meth	4	204	177	10	Multiple masses with increased signal on FLAIR imaging, with the predominant mass involving the corpus callosum and periventricular region; some of these enhancing and have restricted diffusion while portions of these mass do not. Involving the predominantly periventricular white matter with extension into the left pre and postcentral gyri, across the splenium of the corpus callosum, along the fo…
151	M	58.7945	08/07/2018	326	Glioblastoma	IDH-WT	meth	4	151	129	9	Within the right posterior parietal lobe there is an irregular peripherally enhancing lesion with associated T2/FLAIR hyperintensity that measures 2.6 x 2.4 x 2 cm (anteroposterior x transverse x craniocaudal) and demonstrates increased perfusion. Minimal susceptibility is noted within the lesion. There is no associated restricted diffusion. An adjacent area of peripheral enhancement is noted inf…
152	M	49.2027	08/16/2018	471	Anaplastic Astrocytoma	IDH-MT	meth	3	187	168	8	There is a large mixed cystic and soft tissue lesion centered within the right high parietal lobe measuring approximately 6.7 x 3.5 x 6.8 cm (AP x TR x CC). The soft tissue components of the mass scattered nodular areas of enhancement, although the overall mass is predominantly hypoenhancing. Patchy blood degradation products (hemosiderin) are seen corresponding to the cystic components of the ma…
154	M	46.7096	09/08/2018	445	Glioblastoma	IDH-WT	unmeth	4	166	149	11	There is a T2 hyperintense T1 isointense heterogeneous enhancing mass within the right parietal lobe measuring 4.7 x 3.0 x 3.2 cm with internal susceptibility weighted signal. There is central increased perfusion to this region. There are areas of cystic changes within this lesion. There is an inferior ring-enhancing lesion with adjacent vasogenic edema within the posterior right temporal lobe me…
156	F	57.1342	2018-11-23	286	Glioblastoma	IDH-WT	unmeth	4	222	199	13	There is redemonstration of a large peripherally enhancing lobulated cystic mass centered in the right thalamus extending into the right centrum semiovale. The enhancing region measures up to 4.4 x 3.2 x 3.9, with surrounding peripheral T2 FLAIR signal abnormality, which also involves the corpus callosum. There is questionable associated ependymal enhancement in the atrium of the lateral ventricl…
157	F	70.7589	12/15/2016	763	Glioblastoma	IDH-WT	unmeth	4	135	121	7	There is a large partially necrotic partially hemorrhagic lesion centered within the right frontal lobe with irregular thick peripheral enhancement, measuring 3.6 x 3.5 x 4.3 cm. A satellite nodule within the adjacent right temporal lobe measures 8 mm. There is extensive surrounding hyperintense T2/FLAIR signal which in correlation with the enhancing mass results in significant mass effect upon t…
158	M	13.2219	2017-04-15	567	Diffuse midline glioma, H3 K27M-mutant	IDH-WT	unmeth	4	128	109	12	There is a heterogeneously enhancing 1.4 x 1.2 x 1.6 cm (AP by TV by CC) lesion within the pineal gland which demonstrates diffusion restriction. There is associated mass effect on the cerebral aqueduct with enlargement of the lateral and third ventricles and evidence of transependymal flow of CSF. No CSF flow through the cerebral aqueduct is identified on cine imaging. The fourth ventricle is no…
159	F	52.926	2016-12-21	751	Glioblastoma	IDH-WT	meth	4	120	104	9	Centered within the right temporal lobe is a 2.4 x 1.7 x 2.2 cm (AP by TV by CC) T1 hypointense, T2 hyperintense irregular ring-enhancing mass with a centrally necrotic component and foci of susceptibility artifact compatible with intratumoral hemorrhage. There is extensive associated vasogenic edema resulting in local mass effect with superior displacement of the sylvian fissure and effacement o…
161	F	48.6658	08/09/2016	804	Anaplastic Oligodendroglioma	IDH-MT	meth	3	164	146	10	There is a 6.2 x 5.9 x 5.7 cm (AP x TRV x CC) heterogeneous T2/FLAIR hyperintense infiltrative mass expanding the left frontal gyri. There is no appreciable enhancement within the mass. There is serpiginous areas of T1 hyperintense signal scattered throughout the mass which likely represents calcifications. There are scattered areas of calcification within the mass as seen on previous CT. Mild as…
162	F	58.6411	2016-12-29	412	Glioblastoma	IDH-WT	unmeth	4	171	152	12	Again demonstrated is a cystic mass centered in the left parietal lobe measuring 5.0 x 3.2 x 4.6 cm (AP by TRV by CC) demonstrating irregular enhancing soft tissue component with mild restricted diffusion and peripheral enhancement. There is susceptibility artifact associated with the mass, suggesting hemorrhagic components. There is associated surrounding edema and regional mass effect with effa…
163	M	37.4384	2016-09-26	808	Glioblastoma	IDH-MT	meth	4	308	274	14	Demonstrated a midline 22 x 57 x 67 mm circumscribed heterogeneous, enhanced lesion which contains solid and cystic components. Cystic components are primarily situated along the left infralateral component of the tumor. There is a significant mass effect on adjacent lateral ventricles which includes partial effacement of the ventricles and 23 mm midline shift to the right, as well as compression…
164	F	63.5342	2017-04-22	424	Glioblastoma	IDH-WT	meth	4	138	120	7	Large left frontal lobe lesion with peripheral enhancement and predominant central necrosis measures approximately 6 x 5.4 x 4.2 cm (AP x TR x CC) the lesion extends to and abuts the ependyma of the left frontal horn. The lesion combination with the surrounding T2/FLAIR hyperintensity results in severe rightward subfalcine herniation with midline shift of 1 cm. No additional enhancing intracrania…
165	M	76.3041	2016-09-21	586	Glioblastoma	IDH-WT	unmeth	4	178	162	11	Centered within the left temporal lobe is a 4.9 x 2.8 cm lesion which demonstrates areas of hyperintensity and T1 and T2-weighted imaging and areas of central, not peripheral signal dropout on susceptibility weighted imaging. This has increased slightly since the prior exam of 2 where it measured 3.7 x 2.7 cm. There is associated marked prominently peripheral and nodular enhancement on postcontra…
167	M	65.989	04/17/2018	119	Glioblastoma	IDH-WT	meth	4	242	214	15	Confluent FLAIR signal and associated gyral swelling noted in the left hippocampus extending into the corpus callosum and subependymal region of the left ventricular trigone, tracking along the hippocampal tail. Also redemonstrated is a similar right cerebellar FLAIR abnormality. On postcontrast images, there is redemonstration of left ventricular trigonal subependymal rim-enhancement which exten…
168	M	50.737	12/11/2014	1498	Anaplastic Oligodendroglioma	IDH-MT	meth	3	261	233	11	A heterogeneous avidly enhancing mass centered within the superior and medial frontal gyri of the right frontal lobe measures approximately 6.3 x 5.2 x 5.6 cm (AP, TR, CC) in greatest dimensions. The lesion extends anteriorly to the frontal pole and laterally to the middle frontal gyrus. There is enhancement which comes into proximity to the ependyma of the right frontal horn (image 19 of series …
